# Supplementary material for: Governing Distant-Water Fishing within the Blue Economy in Madagascar: Policy Frameworks, Challenges and Pathways
Source: MDPI journal article supplement (doi:10.3390/fishes8070361), 2023-07-11
Supplement: s1 [file s1]

Archive with 1 entries (1 files):
- fishes-2457529-supplementary.pdf
