# Supplementary material for: Governing Distant-Water Fishing within the Blue Economy in Madagascar: Policy Frameworks, Challenges and Pathways
Source: MDPI journal article supplement (doi:10.3390/fishes8070361), 2023-07-11
Supplement: s1 [file s1 › fishes-2457529-supplementary.pdf]

## Article

# Governing Distant-Water Fishing within the Blue Economy in Madagascar: Policy Frameworks, Challenges and Pathways

Mialy Andriamahefazafy <sup>1,2</sup>
<sup>1</sup> Geneva-Science Policy Interface, University of Geneva, Pont d'Arve 28, 1204 Geneva, Switzerland; mialy.rann@unige.ch

<sup>2</sup> Centre for Blue Governance, University of Portsmouth, Winston Churchill Avenue, Portsmouth PO1 2UP, UK

## 1 Supplementary Material 1

### List of actors interviewed in 2017 (31) and 2018 (9)

|           | Status                             | Town         | Reference in the text |
|-----------|------------------------------------|--------------|-----------------------|
| Fishers   | Artisanal fisher and boat owner    | Antsiranana  | ArtFisher1            |
|           | Artisanal fisher and boat owner    | Antsiranana  | ArtFisher2            |
|           | Artisanal fisher and boat owner    | Antsiranana  | ArtFisher3            |
|           | Artisanal fisher                   | Antsiranana  | ArtFisher4            |
|           | Artisanal fisher                   | Antsiranana  | ArtFisher5            |
|           | Artisanal fisher                   | Antsiranana  | ArtFisher6            |
|           | Artisanal fisher                   | Antsiranana  | ArtFisher7            |
|           | Artisanal fisher and boat owner    | Mahajanga    | ArtFisher8            |
|           | Artisanal fisher                   | Mahajanga    | ArtFisher9            |
|           | Fishing association representative | Mahajanga    | AssoFisher1           |
|           | Artisanal fisher                   | Toamasina    | ArtFisher10           |
|           | Artisanal fisher                   | Toamasina    | ArtFisher11           |
|           | Fishing association representative | Toamasina    | AssoFisher2           |
|           | Small-scale fisher                 | Antsiranana  | SSFisher1             |
|           | Small-scale fisher                 | Antsiranana  | SSFisher2             |
|           | Small-scale fisher                 | Antsiranana  | SSFisher3             |
|           | Small-scale fisher                 | Mahajanga    | SSFisher5             |
|           | Small-scale fisher                 | Mahajanga    | SSFisher6             |
|           | Small-scale fisher                 | Mahajanga    | SSFisher7             |
|           | Small-scale fisher                 | Ste-Luce     | SSFisher8             |
|           | Small-scale fisher                 | Ste-Luce     | SSFisher9             |
|           | Small-scale fisher                 | Ste-Luce     | SSFisher10            |
| NGO Staff | Tous Azimut                        | Antsiranana  | NgoRep1               |
|           | Aquatic Services                   | Tolagnaro    | NgoRep2               |
|           | Blue Ventures                      | Antananarivo | NgoRep3               |

**Citation:** Andriamahefazafy, M. Governing Distant-Water Fishing within the Blue Economy in Madagascar: Policy Frameworks, Challenges and Pathways. *Fishes* **2023**, *8*, 361. <https://doi.org/10.3390/fishes8070361>

Academic Editor: Ben Drakeford

Received: 1 June 2023

Revised: 29 June 2023

Accepted: 6 July 2023

Published: 11 July 2023

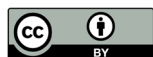

**Copyright:** © 2023 by the author. Licensee MDPI, Basel, Switzerland. This article is an open access article distributed under the terms and conditions of the Creative Commons Attribution (CC BY) license (<https://creativecommons.org/licenses/by/4.0/>).

|                      |                                   |              |          |
|----------------------|-----------------------------------|--------------|----------|
|                      | WWF                               | Antananarivo | NgoRep4  |
|                      | Mihari Network                    | Antananarivo | NgoRep5  |
| Government officials | Statistic Unit Director           | Antsiranana  | GovRep1  |
|                      | Statistic Unit scientist          | Antsiranana  | GovRep2  |
|                      | Statistic Unit Surveyor           | Antsiranana  | GovRep3  |
|                      | Regional fisheries director       | Antsiranana  | GovRep4  |
|                      | Head of MCS regional unit         | Antsiranana  | GovRep5  |
|                      | Regional fisheries director       | Tolagnaro    | GovRep6  |
|                      | Statistic Unit scientist          | Mahajanga    | GovRep7  |
|                      | Regional fisheries director       | Mahajanga    | GovRep8  |
|                      | Director of fisheries             | Antananarivo | GovRep9  |
|                      | Head of statistics unit           | Antananarivo | GovRep10 |
|                      | Head of industrial fisheries unit | Antananarivo | GovRep11 |
|                      | Head of tuna fisheries unit       | Antananarivo | GovRep12 |
|                      | Head of MCS unit                  | Antananarivo | GovRep13 |

## 2 Supplementary Material 2

### Summary of key clauses in the SWIOFC guidelines on minimum terms and conditions for fishing access agreements

| Clause                          | Content                                                                                                                                                                                                                                                                                                                                                                                                                                                                                                                                                                                                                                                                                                                                              |
|---------------------------------|------------------------------------------------------------------------------------------------------------------------------------------------------------------------------------------------------------------------------------------------------------------------------------------------------------------------------------------------------------------------------------------------------------------------------------------------------------------------------------------------------------------------------------------------------------------------------------------------------------------------------------------------------------------------------------------------------------------------------------------------------|
| Appointment of a national agent | 14.1. Each coastal State should require the flag States' fishermen's associations, and operators of licensed foreign fishing vessels, supply and transport vessels to appoint a certified agent from the coastal State. The coastal State should hold <u>the agent legally accountable for the vessel and its activities, including the ability to receive documentation of and respond to legal processes.</u>                                                                                                                                                                                                                                                                                                                                      |
| Bycatch                         | 22.1. <u>All licensed fishing vessels should land all bycatch at a designated port and should not discard at sea fish except for endangered, threatened and protected species (ETPs), which should be released immediately after, capture to minimize mortality.</u>                                                                                                                                                                                                                                                                                                                                                                                                                                                                                 |
| Crew                            | 23.1. SWIOFC <u>States should encourage at least 10% employment of regional crews on foreign fishing vessels</u> licensed in the region.                                                                                                                                                                                                                                                                                                                                                                                                                                                                                                                                                                                                             |
| Financial compensation          | <p>7.1. States may receive financial <u>compensation</u> for permitting a fishing, supply or transport vessel to operate within waters under their national jurisdiction <u>with due consideration of, <i>inter alia</i>, potential catch, its potential value based on a prevailing market price, and the cost of management</u> in regard to tuna and tuna-like species resources.</p> <p>7.2. States will strive to work together to standardize and harmonize financial <u>compensation</u> for access to resources of tuna and tuna-like species within waters under their national jurisdiction <u>with at least a minimum of twelve (12%) percent of the average prevailing market value</u> of the tuna and tuna-like species resources.</p> |

|                                                  |                                                                                                                                                                                                                                                                                                                                                                                                                                                                                                                                                                                                                                                     |
|--------------------------------------------------|-----------------------------------------------------------------------------------------------------------------------------------------------------------------------------------------------------------------------------------------------------------------------------------------------------------------------------------------------------------------------------------------------------------------------------------------------------------------------------------------------------------------------------------------------------------------------------------------------------------------------------------------------------|
| Fishing zone                                     | <p>10.1. <u>No licensed foreign fishing vessels</u>, including supply and transport vessels, should be permitted to operate within the internal waters, archipelagic waters (in the case of an archipelagic State), <u>or territorial sea, or in any other restricted or protected area</u> of a SWIOFC State.</p> <p>10.2. SWIOFC States should provide to the foreign licensed fishing vessels with geographical <u>coordinates of the licensing states' restricted and protected areas</u>.</p>                                                                                                                                                  |
| Landing                                          | 21.1. SWIOFC States should require that all foreign fishing vessels land all their catch in one of their designated ports.                                                                                                                                                                                                                                                                                                                                                                                                                                                                                                                          |
| Management of FADs                               | 18.5 SWIOFC States may decide the number of FADs deployed by licensed vessels in waters under their jurisdiction. This number should not exceed the number of drifting FADs set in the relevant IOTC Resolutions.                                                                                                                                                                                                                                                                                                                                                                                                                                   |
| Measure in case of VMS/AIS malfunction           | 13.6. <u>Licensing States should require licensed vessels to transmit data through other means in the case of a VMS or AIS malfunction</u> , and commit to repairing any such malfunction within seven (7) days to reinstate regular data transmissions, or to return to a port designated by the licensing coastal State. [...]                                                                                                                                                                                                                                                                                                                    |
| Protection of observers                          | 12.7. <u>In case of non-observance or breach of the international rules for the safety and protection of observers</u> against bribing, threatening, intimidation, assault and/or sexual harassment, the relevant coastal and flag States may collaborate and adopt in a coordinated manner penalties and sanctions under their respective jurisdictions. These penalties may include, but not be limited to, the suspension of fishing access to the SWIOFC Region.                                                                                                                                                                                |
| Publication of licensed vessels                  | 8.1. SWIOFC States should compile and publish a regional record of the foreign fishing vessels, including supply and transport vessels, licensed to operate in the SWIOFC Region in regard to tuna and tuna-like species.                                                                                                                                                                                                                                                                                                                                                                                                                           |
| Responsibility of flag state/fishing association | <p>9.1. <u>The flag State of foreign fishing vessels</u> licensed to operate in waters under jurisdiction of a SWIOFC State should collaborate with SWIOFC States to ensure the compliance of its flagged vessels with the applicable international law, laws and regulations of the SWIOFC State and the flag State, respectively. [...]</p> <p>9.2. The <u>fishing associations</u> through which vessels received licenses to operate in waters under jurisdiction of a SWIOFC State should ensure compliance of their vessels with the SWIOFC State's laws and regulations and the terms of any access agreements under which they operate.</p> |
| Transshipment                                    | 20.2. SWIOFC States should only allow transshipment to occur at designated ports or offshore terminals, in accordance with the PSMA and the IOTC Resolution on PSM. <u>At-sea transshipments by any fishing vessel should be prohibited</u> within waters under the jurisdiction of a SWIOFC State, unless the safety of the vessel and crew is at risk, and authorization is issued by the licensing State.                                                                                                                                                                                                                                        |
| Vessel reporting                                 | 11.2. SWIOFC States should require all licensed foreign fishing vessels operating in regard to tuna and tuna-like species to report the quantity and type of catch by species harvested after each fishing trip.                                                                                                                                                                                                                                                                                                                                                                                                                                    |
